# Supplementary material
Source: Springer Nature journal article supplement (https://www.springermedizin.de/resource/supplementary/12887_2014_984_MOESM1_ESM.pdf/9476852)
Supplement: MOESM1 [file 9476852]

**Family recruitment**  
Phone call  
Group pseudo-randomization

**APAH Intervention**  
PWS (n=35), OB (n=50)

**Wait-list Control**  
PWS (n=10), OB (n=20)

**INTERVENTION PHASE**

**Baseline Assessment**

- Child measurements
  - Physical activity
  - Motor proficiency
  - Central sensory integration
  - Body composition
  - Self-efficacy
  - Quality of life
- Parent questionnaire

*1 week no contact*

**APAH curriculum training**

*9 parent phone calls*

**Mid-intervention Assessment**

After 12 weeks of intervention

*6 parent phone calls*

**Week 24 Physical Activity**

**Post-intervention or control assessment after 24 weeks**

All measurements repeated

**NO INTERVENTION PHASE**

**Baseline Assessment**

- Child measurements
  - Physical activity
  - Motor proficiency
  - Central sensory integration
  - Body composition
  - Self-efficacy
  - Quality of life
- Parent questionnaire

*23 weeks no contact*

**Week 24 Physical Activity**

*Receive intervention*
